# Supplementary material
Source: Royal Society of Chemistry journal article supplement (doi:10.1039/d6cc02056a)
Supplement: d6cc02056a1.pdf [file d6cc02056a1.pdf]

## Supporting Information for

# Control of Higher-Order Supramolecular Aggregation Driven by Crowding Effects in a PDMS/Oligomer System

Shogo Amemori, <sup>\*,a,b,c</sup> and Motohiro Mizuno<sup>\*, a,b,c</sup>

<sup>a</sup>NanoMaterials Research Institute(NanoMaRI), Kanazawa University, Kanazawa 920-1192, Japan

<sup>b</sup>Graduate School of Natural Science and Technology, Kanazawa University, Kanazawa 920-1192, Japan

<sup>c</sup>Institute for Frontier Science Initiative, Kanazawa University, Kanazawa 920-1192, Japan

E-mail: amemori@stuff.kanazawa-u.ac.jp; mizuno@se.kanazawa-u.ac.jp.

## 1. Experimental Section

### Instrumentation

$^1\text{H}$  and  $^{13}\text{C}$  NMR measurements were recorded on a Bruker Avance Neo 400 instrument ( $^1\text{H}$  400 MHz and  $^{13}\text{C}$  100 MHz). UV-vis spectra were recorded on a JASCO V-750 spectrometer with a JASCO ETCS-761 temperature controller. Circular dichroism (CD) and linear dichroism (LD) spectra were recorded on a JASCO J-1500 spectropolarimeter. Dynamic light scattering (DLS) measurements were performed using a Horiba nano Partica SZ-100-Z instrument. Viscosity measurements were conducted on an Anton Paar MCR 702 rheometer with a coaxial double-cylinder measuring system. Elemental analysis and FAB mass spectroscopy were performed at the Research Institute for Instrumental Analysis, Advanced Science Research Center, Kanazawa University.

### Materials.

Unless otherwise noted, all commercially available reagents and solvents were used as received without further purification. Octamethyltrisiloxane (OMTS) used for UV-vis, CD, and LD measurements was distilled prior to use.

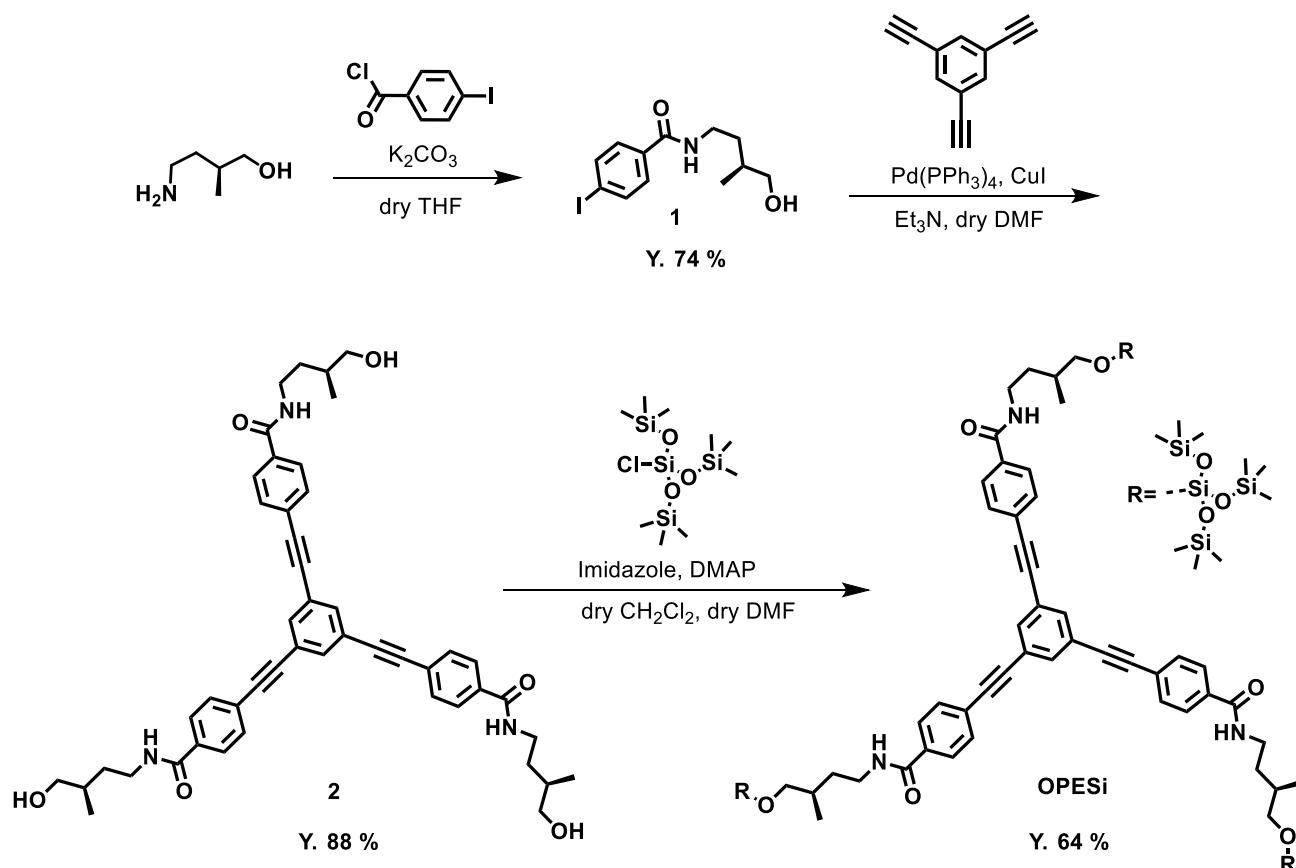

## Synthesis of **1**

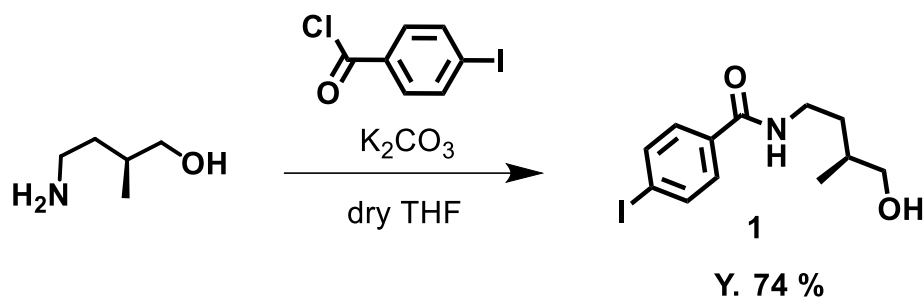

To a mixture of (*R*)-4-amino-2-methyl-1-butanol (515 mg, 5.0 mmol) and  $K_2CO_3$  (1.38 g, 10.0 mmol) in dry THF (10 mL), a solution of 4-iodobenzoyl chloride (1.33 g, 5.0 mmol) in dry THF (5 mL) was slowly added at 0 °C under  $N_2$ . After the mixture was stirred overnight at room temperature, it was poured into water and extracted with dichloromethane. The organic layer was washed with water and dried over anhydrous  $Na_2SO_4$ , followed by evaporation to dryness. The residue was purified by silica gel column chromatography to obtain **1** as a white solid (1.24 g, 3.7 mmol, 74 %).

$^1H$  NMR (400 MHz,  $CDCl_3$ , TMS standard):  $\delta$  (ppm) 0.97 (d,  $J = 6.8$  Hz, 3 H,  $CH_3$ ), 1.53-1.63 (m, 1 H,  $CH_2$ ), 1.68-1.82 (m, 2 H,  $CH$  and  $CH_2$ ), 2.07 (t,  $J = 5.2$  Hz, 1 H,  $OH$ ), 3.40-3.64 (m, 4 H,  $CH_2$ ), 6.68 (brs, 1 H,  $NH$ ), 7.49 (dt,  $J = 8.5, 4.0$  Hz, 2 H,  $ArH$ ), 7.76 (dt,  $J = 8.6, 4.0$  Hz, 2 H,  $ArH$ ).  $^{13}C$  NMR (100 MHz,  $CDCl_3$ , solvent standard):  $\delta$  (ppm) 17.18, 33.60, 33.88, 38.32, 68.01, 98.37, 128.66, 134.24, 137.88, 166.91. HRMS(FAB) Calcd for  $C_{12}H_{17}INO_2^+$  [( $M+H$ ) $^+$ ]:  $m/z$  334.0299, Found:  $m/z$  334.0308. Elemental analysis: calculated for  $C_{12}H_{16}INO_2$ : C 43.26, H 4.84, N 4.20, Found: C 43.14, H 4.83, N 4.26.

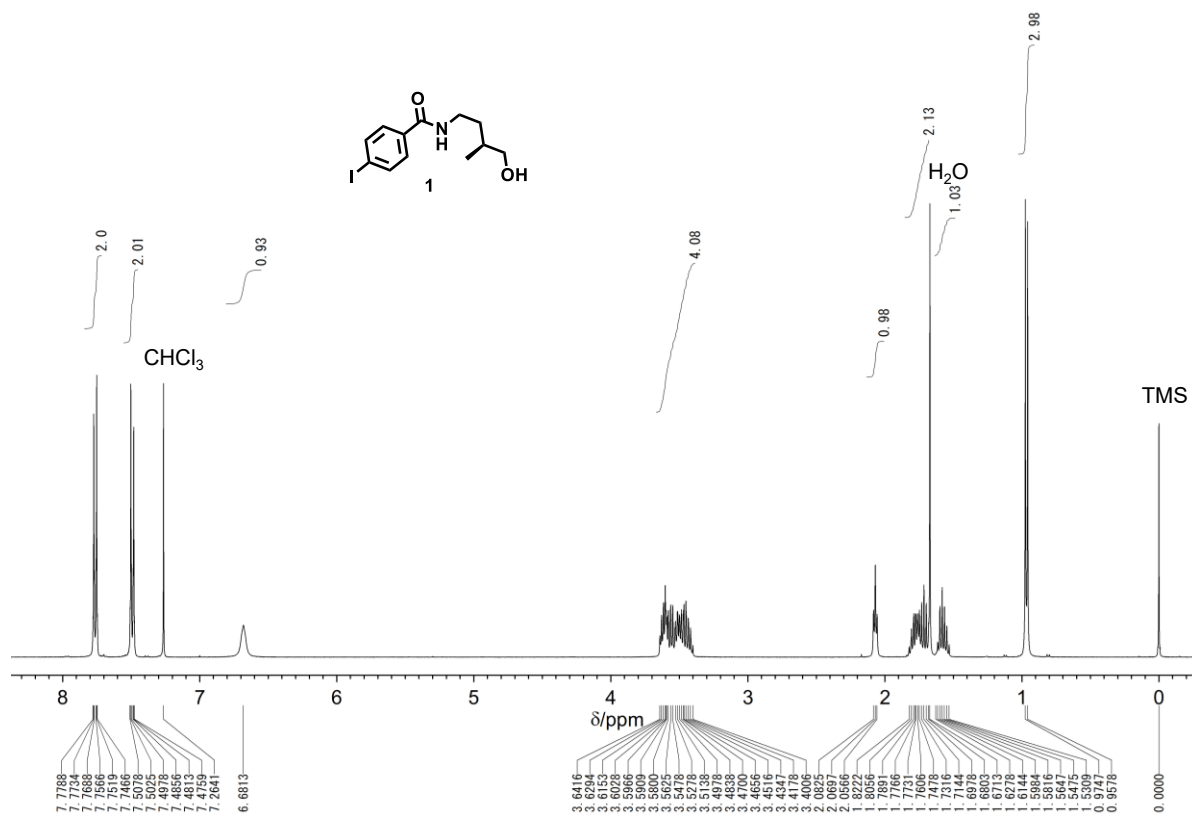

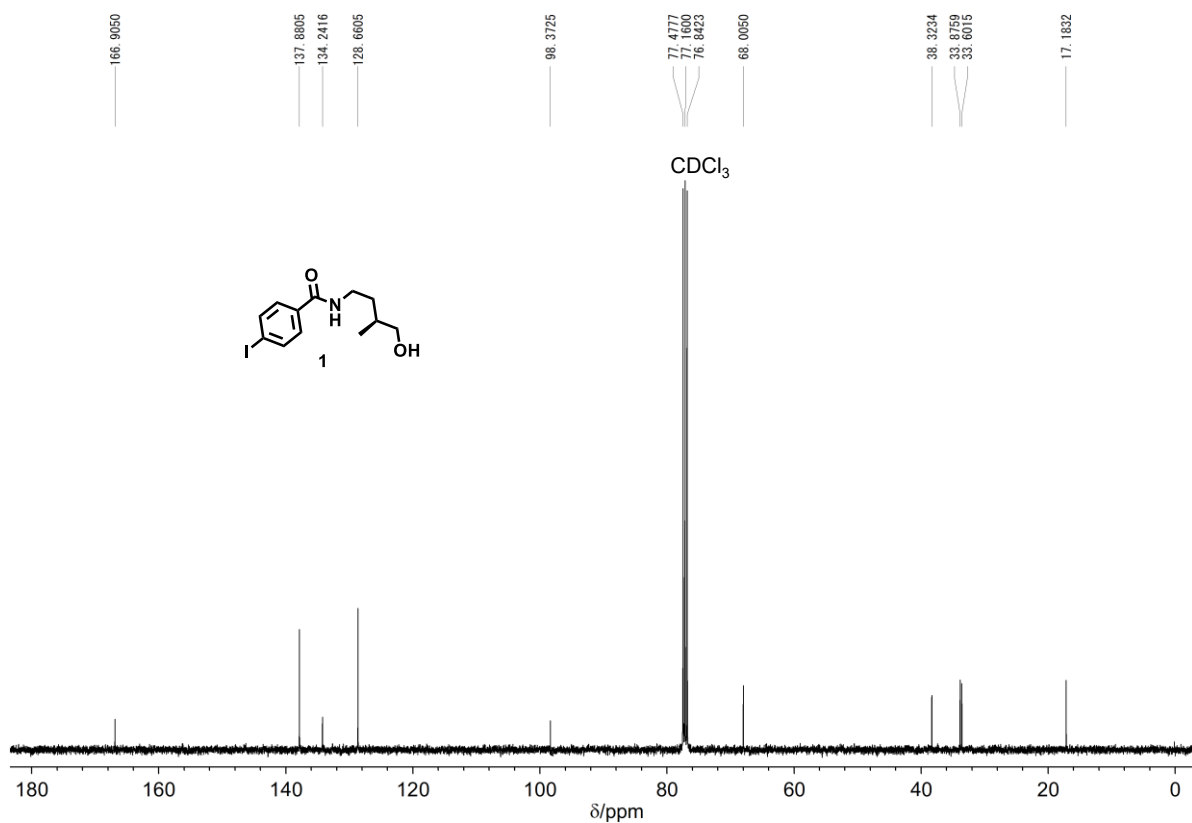

$^{13}\text{C}$  NMR spectrum (100 MHz,  $\text{CDCl}_3$ , solvent standard) of 1.

### Synthesis of 2

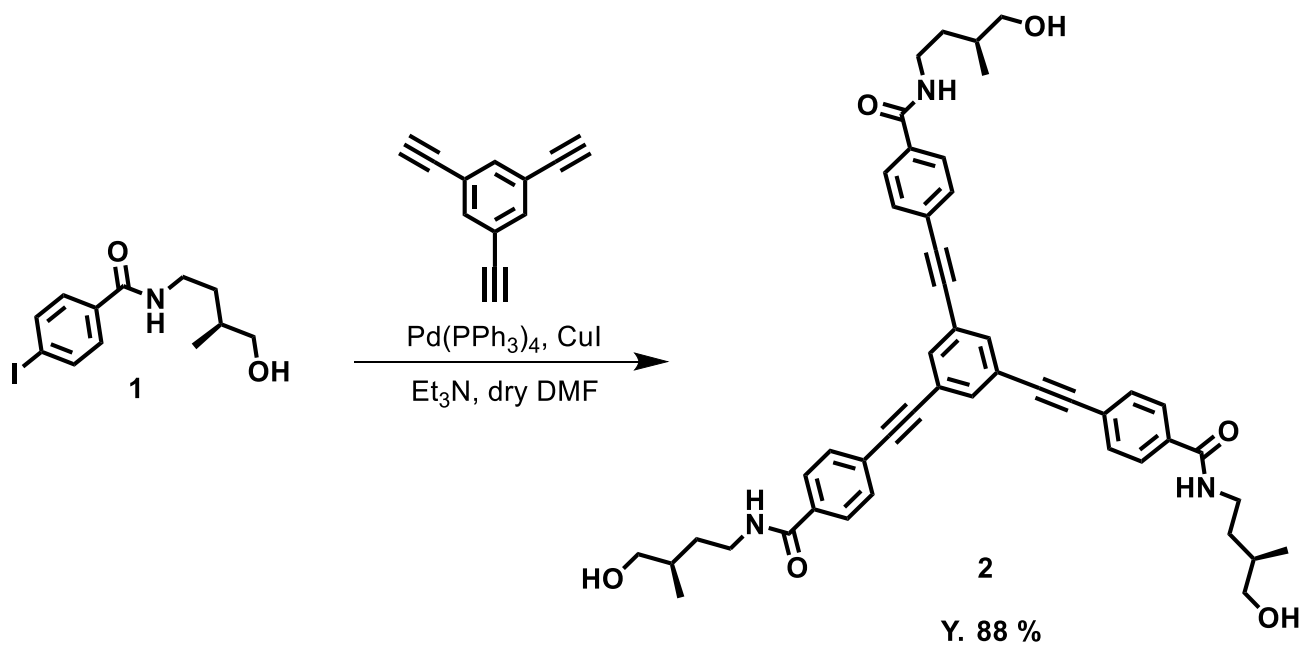

A mixture of compound 1 (430 mg, 1.3 mmol) and triethylamine (5 mL) and dry DMF (5 mL) was bubbled with  $\text{N}_2$  for 30 minutes. To the mixture,  $\text{Pd}(\text{PPh}_3)_4$  (18 mg, 0.015 mmol) and  $\text{CuI}$  (8.9 mg, 0.047 mmol) were added under  $\text{N}_2$ .

After bubbling with N<sub>2</sub> for 30 minutes, the mixture was stirred at room temperature for 30 minutes, followed by the addition of 1, 3, 5-triethynylbenzene (52 mg, 0.35 mmol). The resulting mixture was heated at 60 °C for 7 hours. After cooling to room temperature, solvents were evaporated under reduced pressure. The crude material was purified by silica gel column chromatography (CH<sub>2</sub>Cl<sub>2</sub>/MeOH=9/1 to 85/15) to obtain **2** as a white solid (235 mg, 0.31 mmol, 88 %).

<sup>1</sup>H NMR (400 MHz, DMSO-*d*<sub>6</sub>, TMS standard): δ (ppm) 0.89 (d, *J* = 6.6 Hz, 9 H, CH<sub>3</sub>), 1.24-1.33 (m, 3 H, CH<sub>2</sub>), 1.54-1.71 (m, 6 H, CH and CH<sub>2</sub>), 3.21-3.38 (m, 12 H, CH<sub>2</sub>), 4.46 (t, *J* = 5.2 Hz, 3 H, OH), 7.69 (d, *J* = 8.5 Hz, 6 H, ArH), 7.84 (s, 3 H, ArH), 7.91 (d, *J* = 8.5 Hz, 6 H, ArH), 8.55 (t, *J* = 5.6 Hz, 3 H, NH). <sup>13</sup>C NMR (100 MHz, DMSO-*d*<sub>6</sub>, TMS standard): δ (ppm) 16.63, 32.79, 33.15, 37.31, 66.03, 88.93, 90.34, 123.41, 124.05, 127.46, 131.37, 134.10, 134.85, 165.05. HRMS(FAB) Calcd for C<sub>48</sub>H<sub>52</sub>N<sub>3</sub>O<sub>6</sub><sup>+</sup> [(M+H)<sup>+</sup>]: *m/z* 766.3851, Found: *m/z* 766.3859.

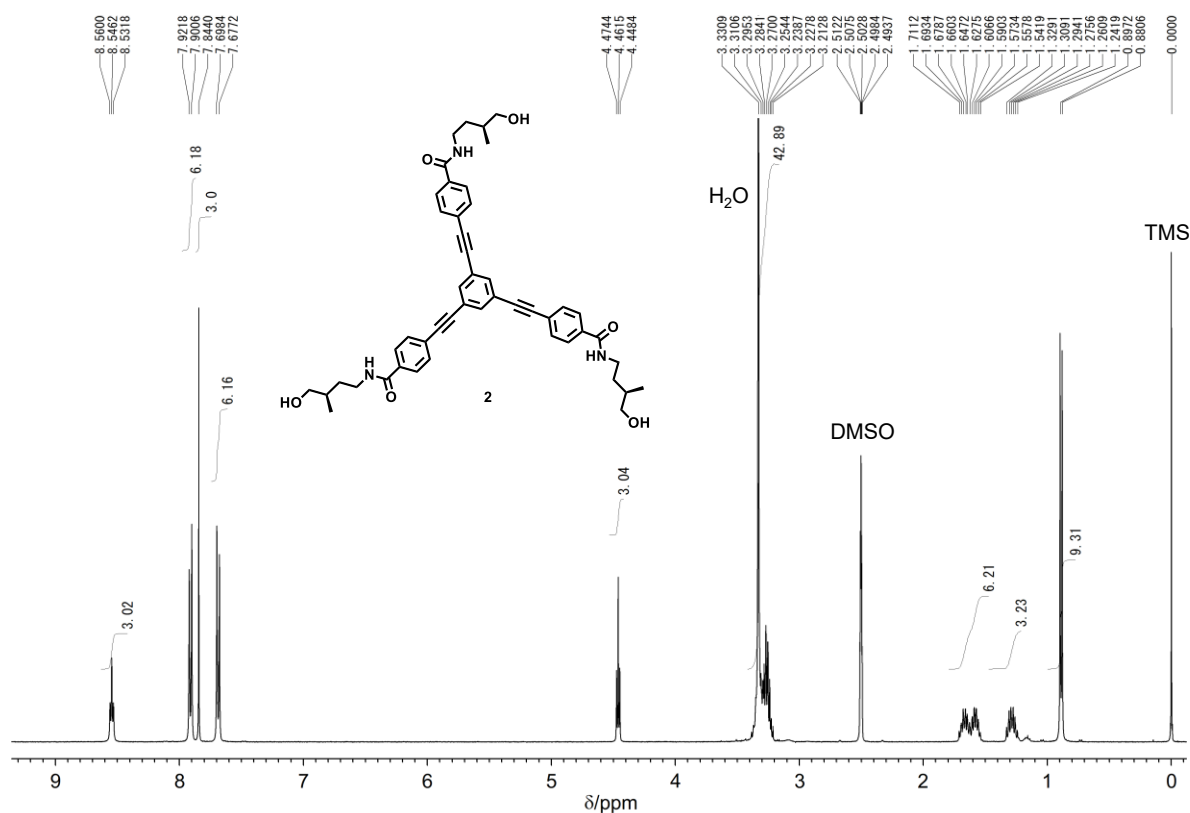

<sup>1</sup>H NMR spectrum (400 MHz, DMSO-*d*<sub>6</sub>, TMS standard) of **2**.

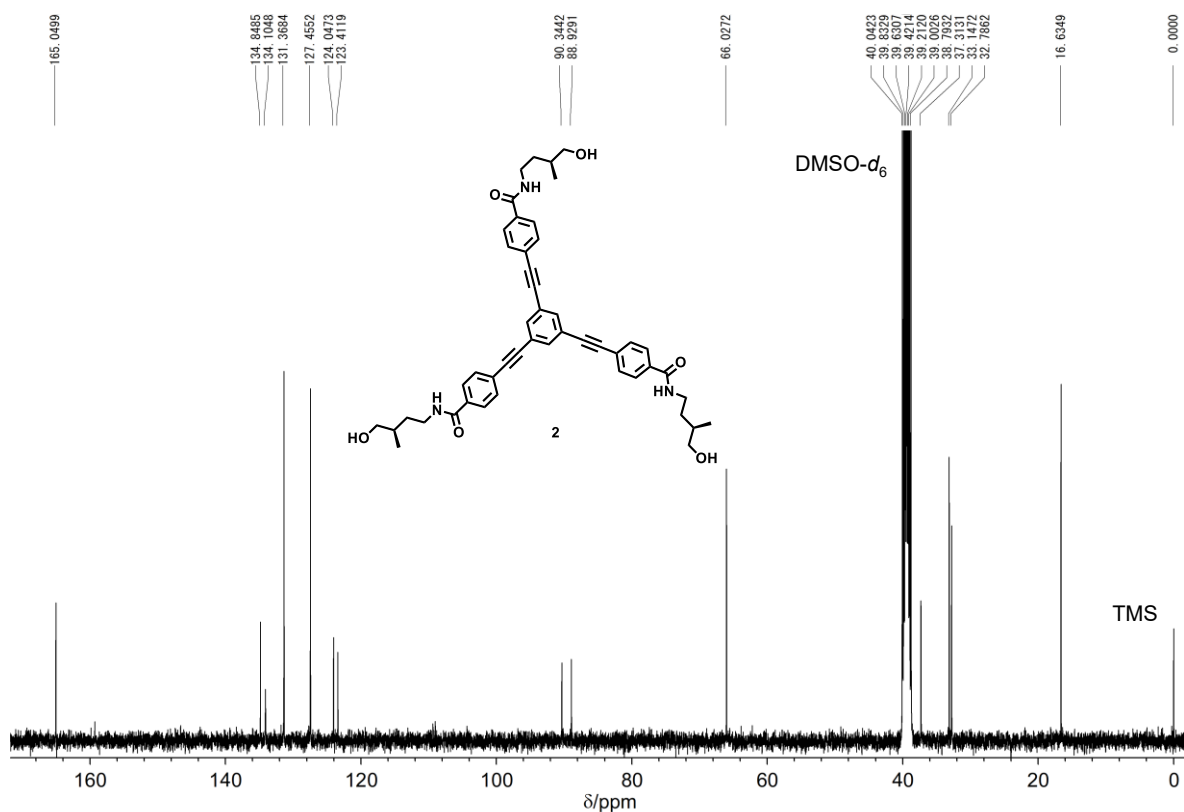

$^{13}\text{C}$  NMR spectrum (100 MHz,  $\text{DMSO-}d_6$ , TMS standard) of **2**.

### Synthesis of OPESi

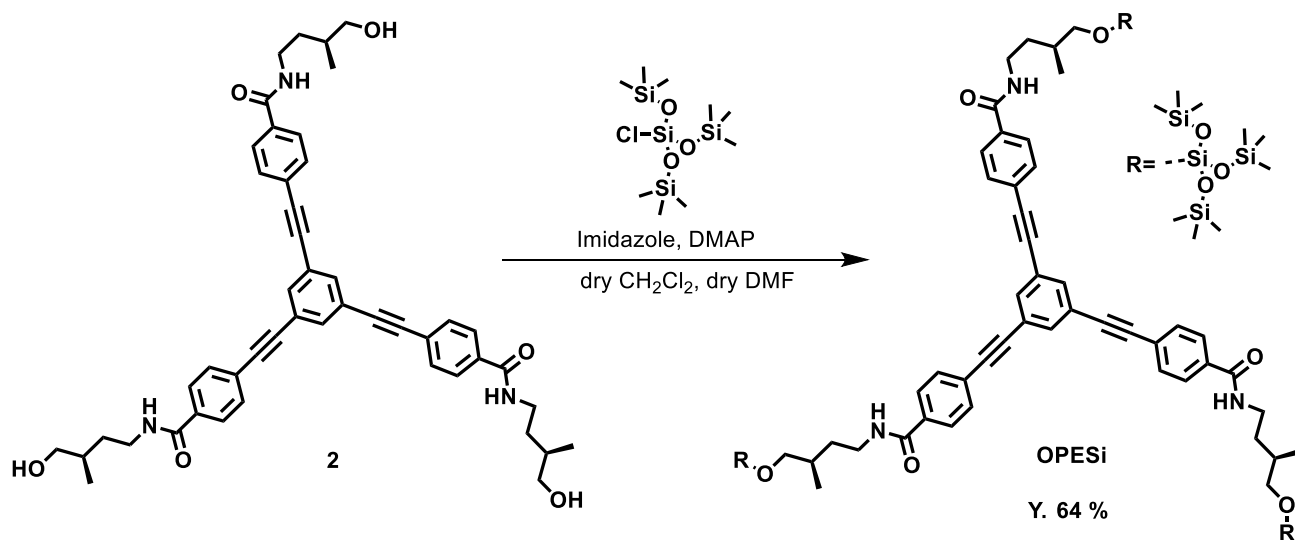

To a solution of compound **2** (168 mg, 0.22 mmol), 4-dimethylaminopyridine (5 mg, 0.04 mmol) and imidazole (107 mg, 1.58 mmol) in dry DMF (3.5 mL) and dry  $\text{CH}_2\text{Cl}_2$  (3.5 mL), tris(trimethylsilyloxy)chlorosilane (261 mg, 0.78 mmol) was slowly added at 0 °C under  $\text{N}_2$ . After the mixture was stirred at room temperature for 4 hours, it was poured into water and extracted with hexane/EtOAc (1/1). The organic layer was washed with water and dried over

anhydrous Na<sub>2</sub>SO<sub>4</sub>, followed by evaporation to dryness. The residue was purified by column chromatography (CH<sub>2</sub>Cl<sub>2</sub>/MeOH=98/2) to obtain **OPESi** as a white solid (232 mg, 0.14 mmol, 64 %).

<sup>1</sup>H NMR (400 MHz, CDCl<sub>3</sub>, solvent standard): δ (ppm) 0.12 (s, 81 H, SiCH<sub>3</sub>), 0.95 (d, *J* = 6.8 Hz, 9 H, CH<sub>3</sub>), 1.53-1.62 (m, 3 H, CH<sub>2</sub>), 1.66-1.74 (m, 3 H, CH<sub>2</sub>), 1.77-1.85 (m, 3 H, CH), 3.47-3.62 (m, 12 H, CH<sub>2</sub>), 6.48 (t, *J* = 5.6 Hz, 3 H, NH), 7.57 (d, *J* = 8.5 Hz, 6 H, ArH), 7.69 (s, 3 H, ArH), 7.78 (d, *J* = 8.5 Hz, 6 H, ArH). <sup>13</sup>C NMR (100 MHz, CDCl<sub>3</sub>, solvent standard): δ (ppm) 1.76, 17.02, 33.63, 38.22, 68.02, 89.74, 90.13, 123.98, 125.80, 127.16, 131.94, 134.60, 134.80, 166.57. HRMS(FAB) Calcd for C<sub>75</sub>H<sub>130</sub>N<sub>3</sub>O<sub>15</sub>Si<sub>12</sub><sup>+</sup> [(M+H)<sup>+</sup>]: *m/z* 1648.6728, Found: *m/z* 1648.6776.

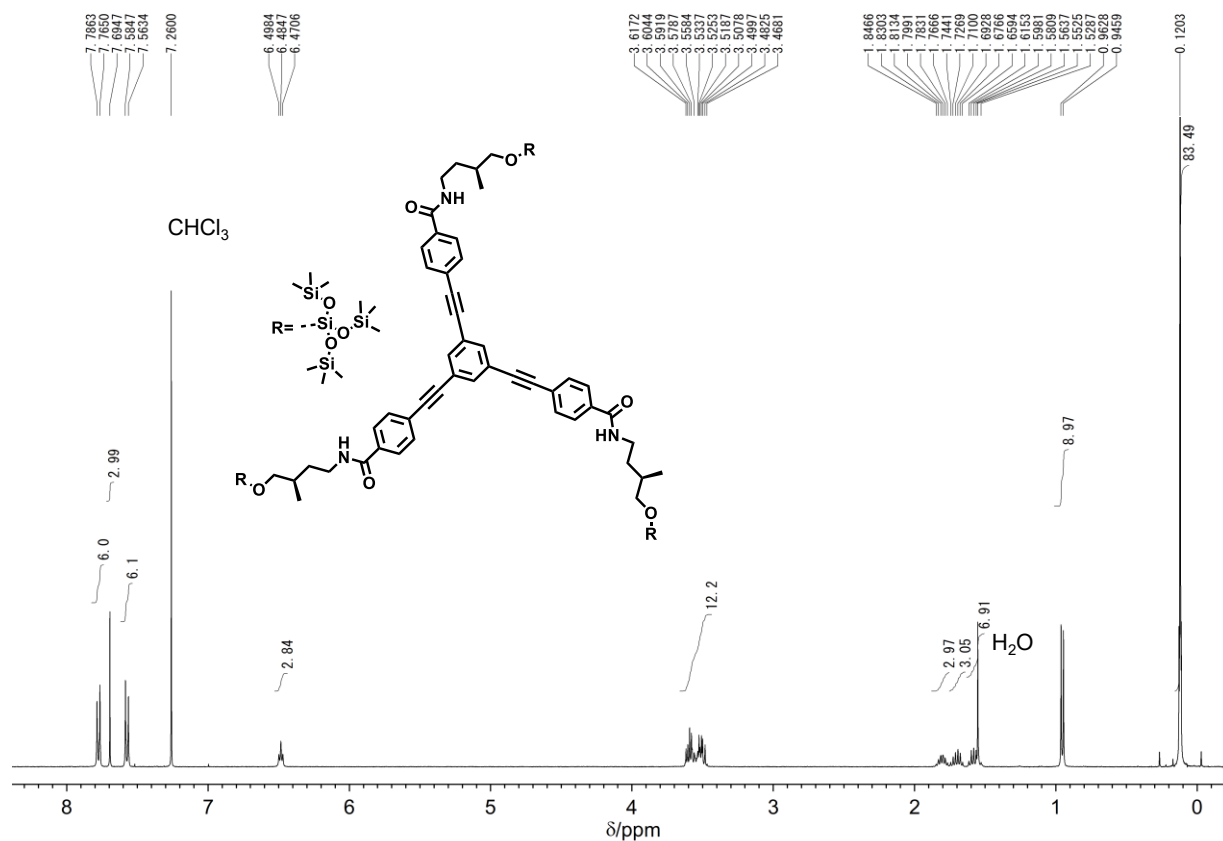

<sup>1</sup>H NMR spectrum (400 MHz, CDCl<sub>3</sub>, solvent standard) of **OPESi**.

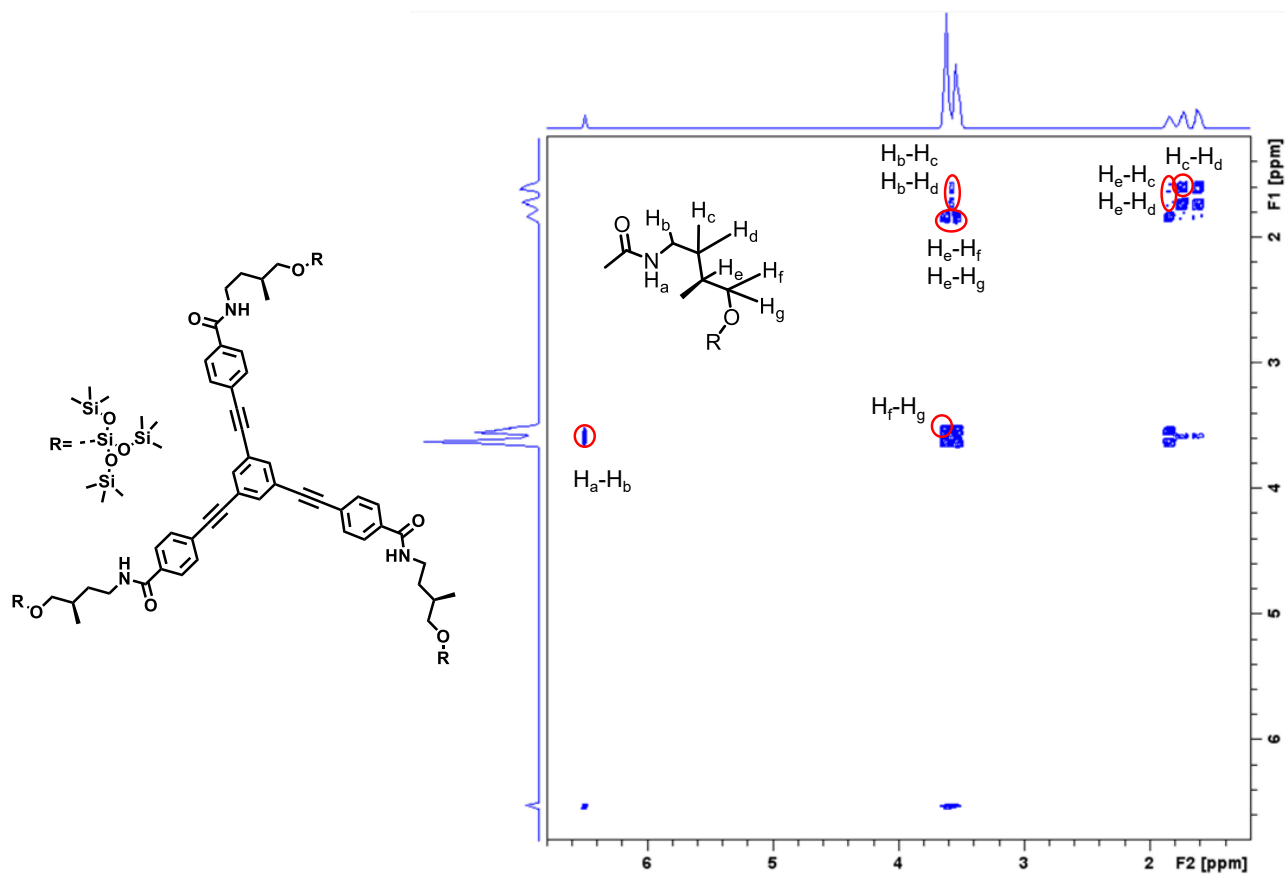

<sup>1</sup>H-COSY NMR spectrum (400 MHz, CDCl<sub>3</sub>) of a selected region of **OPESi**.

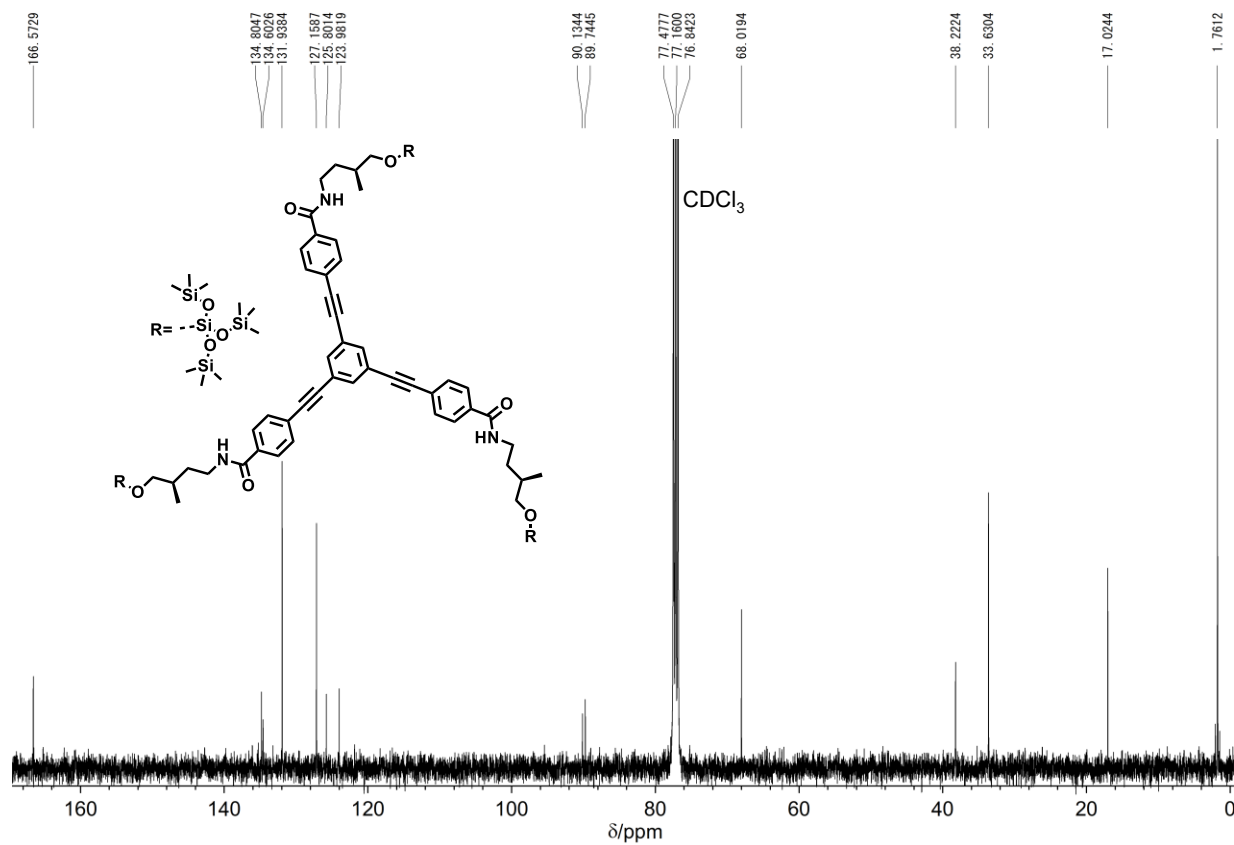

<sup>13</sup>C NMR spectrum (100 MHz, CDCl<sub>3</sub>, solvent standard) of **OPESi**.

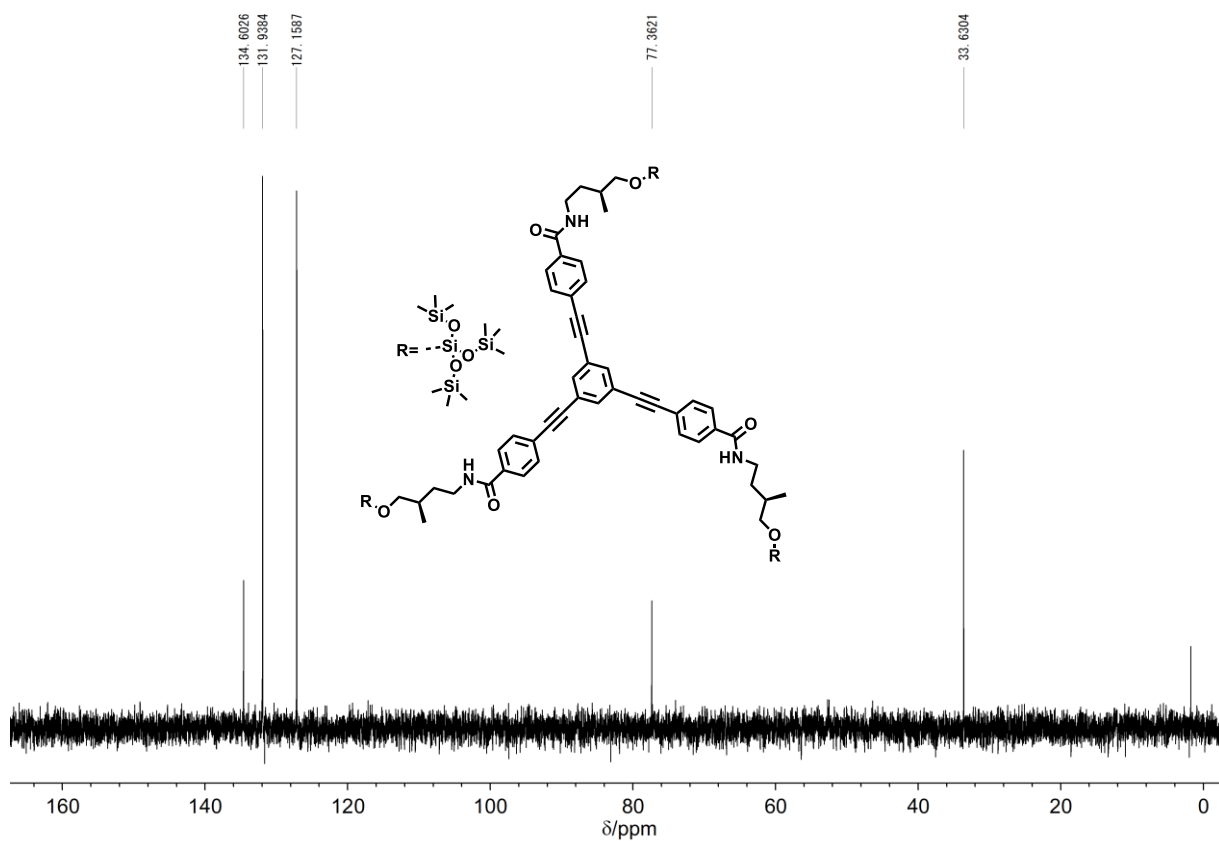

$^{13}\text{C}$  (DEPT90) NMR spectrum (100 MHz,  $\text{CDCl}_3$ ) of **OPESi**.

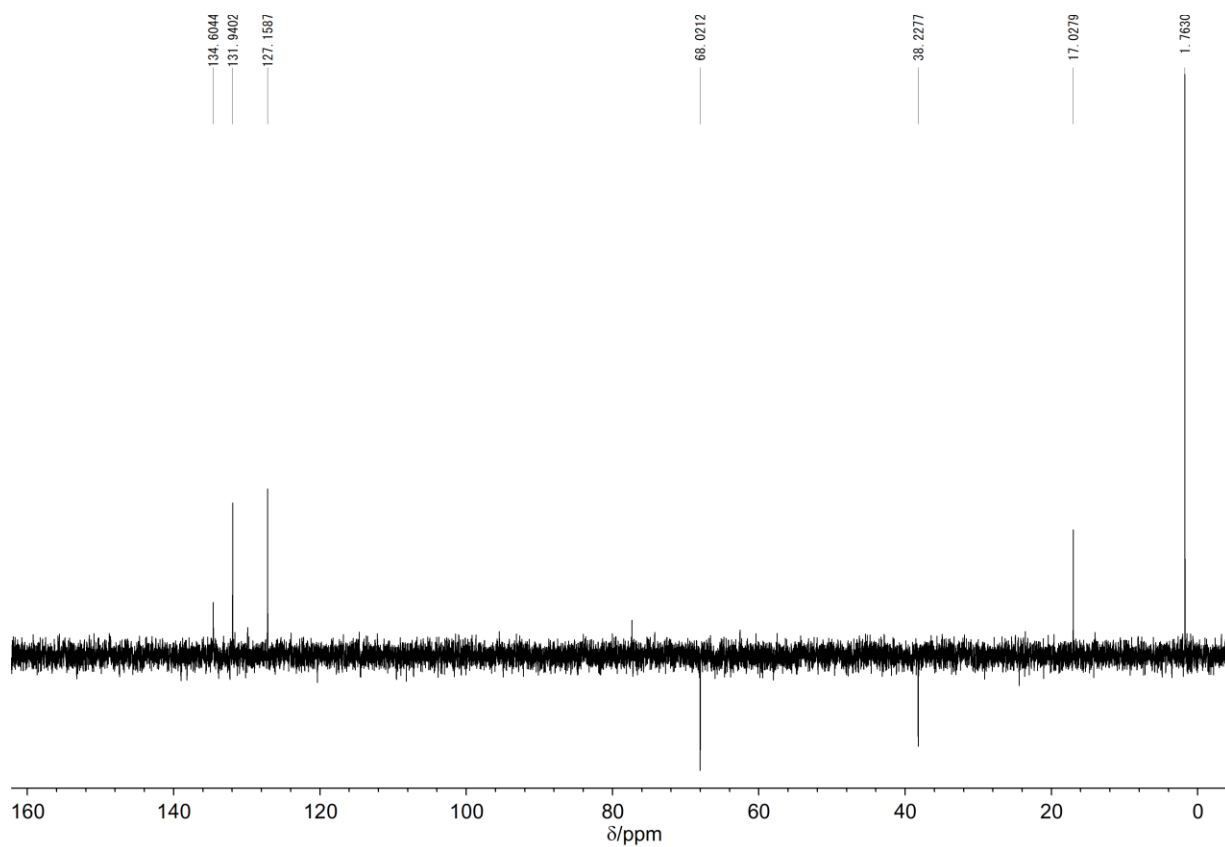

$^{13}\text{C}$  (DEPT135) NMR spectrum (100 MHz,  $\text{CDCl}_3$ ) of **OPESi**.

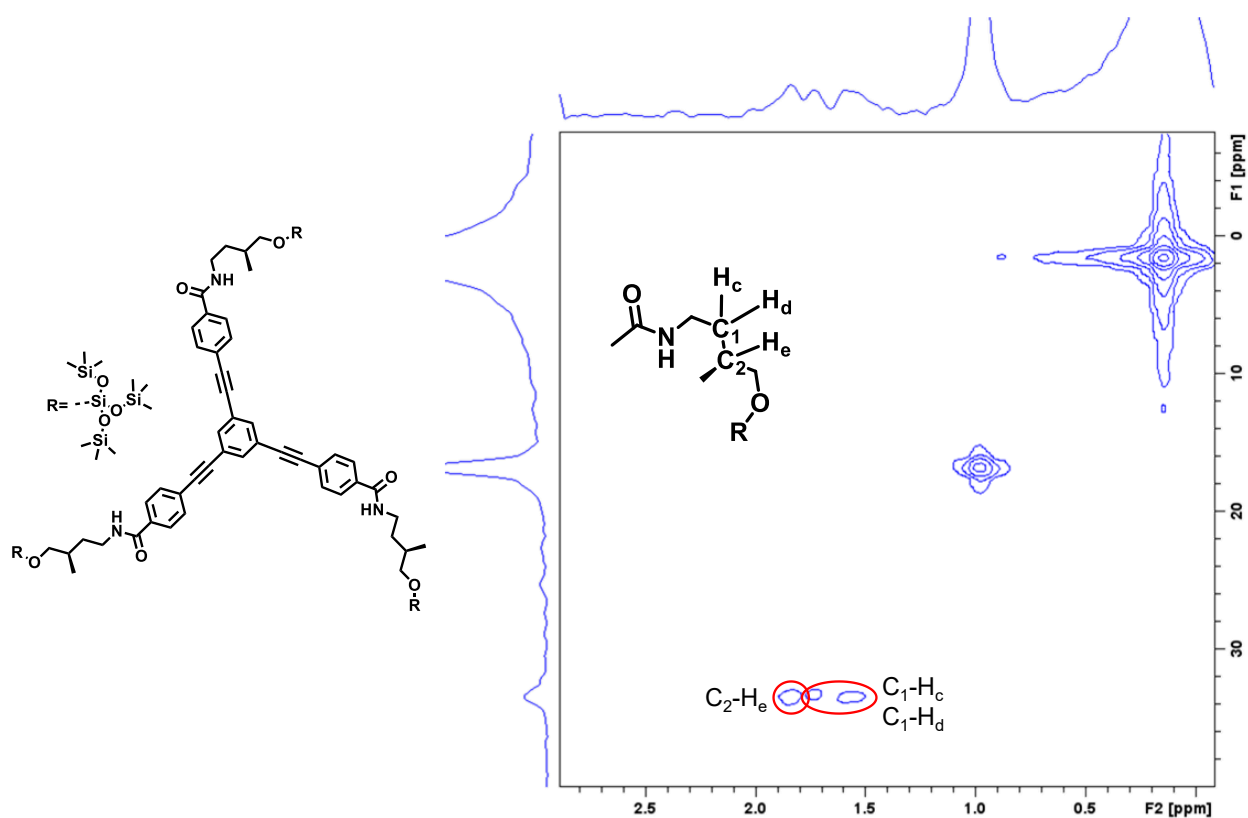

$^1\text{H}$ ,  $^{13}\text{C}$ -HMQC NMR spectrum ( $\text{CDCl}_3$ ) of a selected region of OPESi.

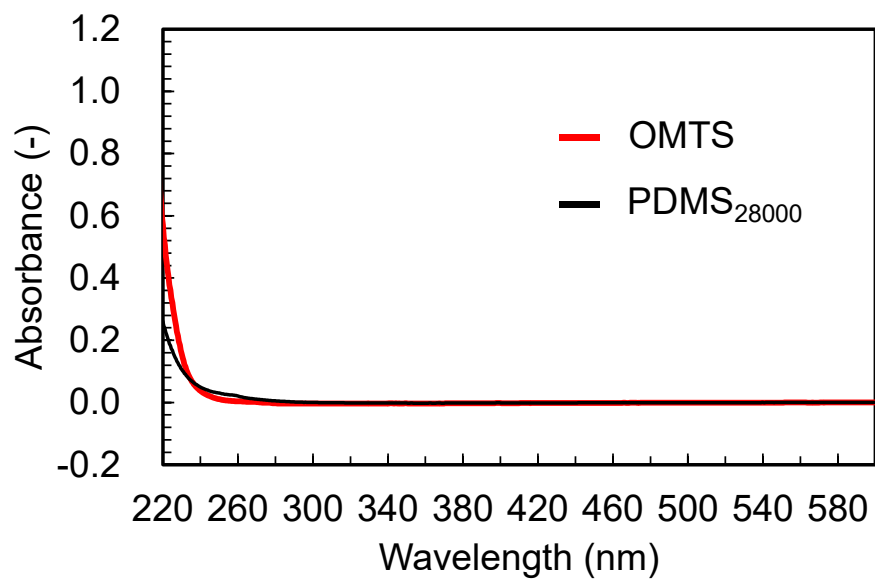

Fig. S1 UV-vis spectra of OTMS and PDMS<sub>28000</sub> (path length = 10 mm).

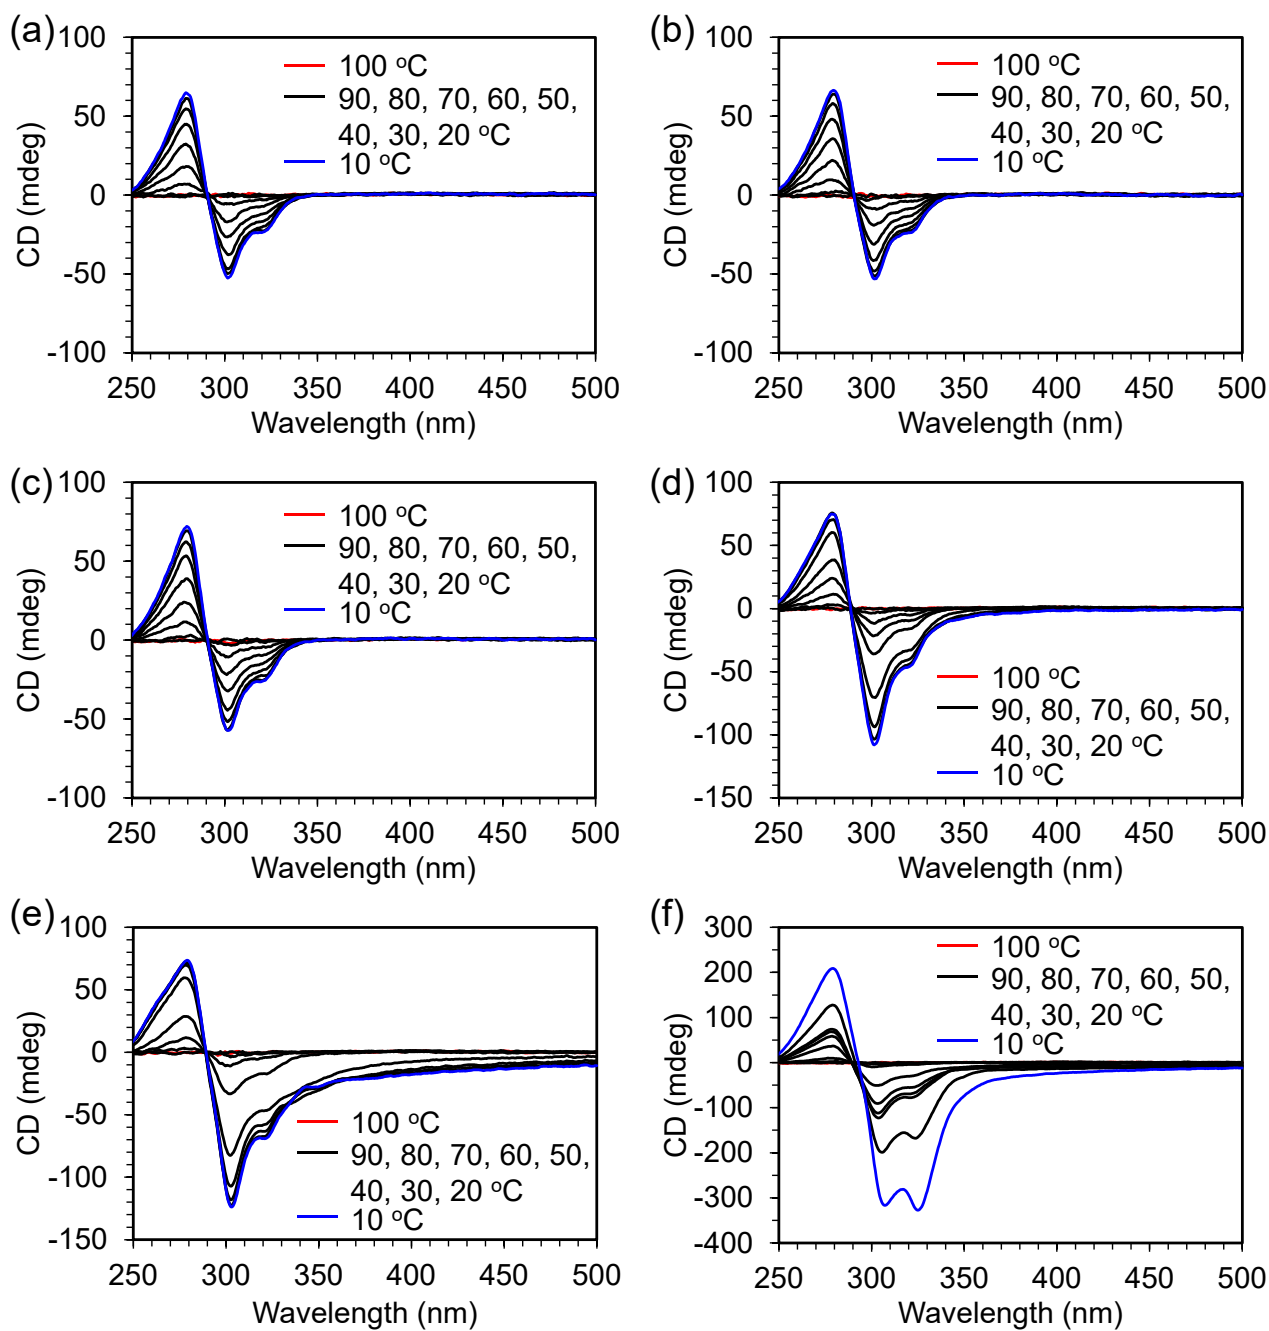

Fig. S2 Temperature-dependent CD spectra of **OPESi** in (a) pure OMTS and (b) 6, (c) 8, (d) 10, (e) 12.5, and (f) 15 wt% PDMS<sub>28000</sub>/OMTS solutions ( $[\text{OPESi}] = 5 \times 10^{-5} \text{ M}$ , path length = 2 mm, cooling rate = 1 °C/min).

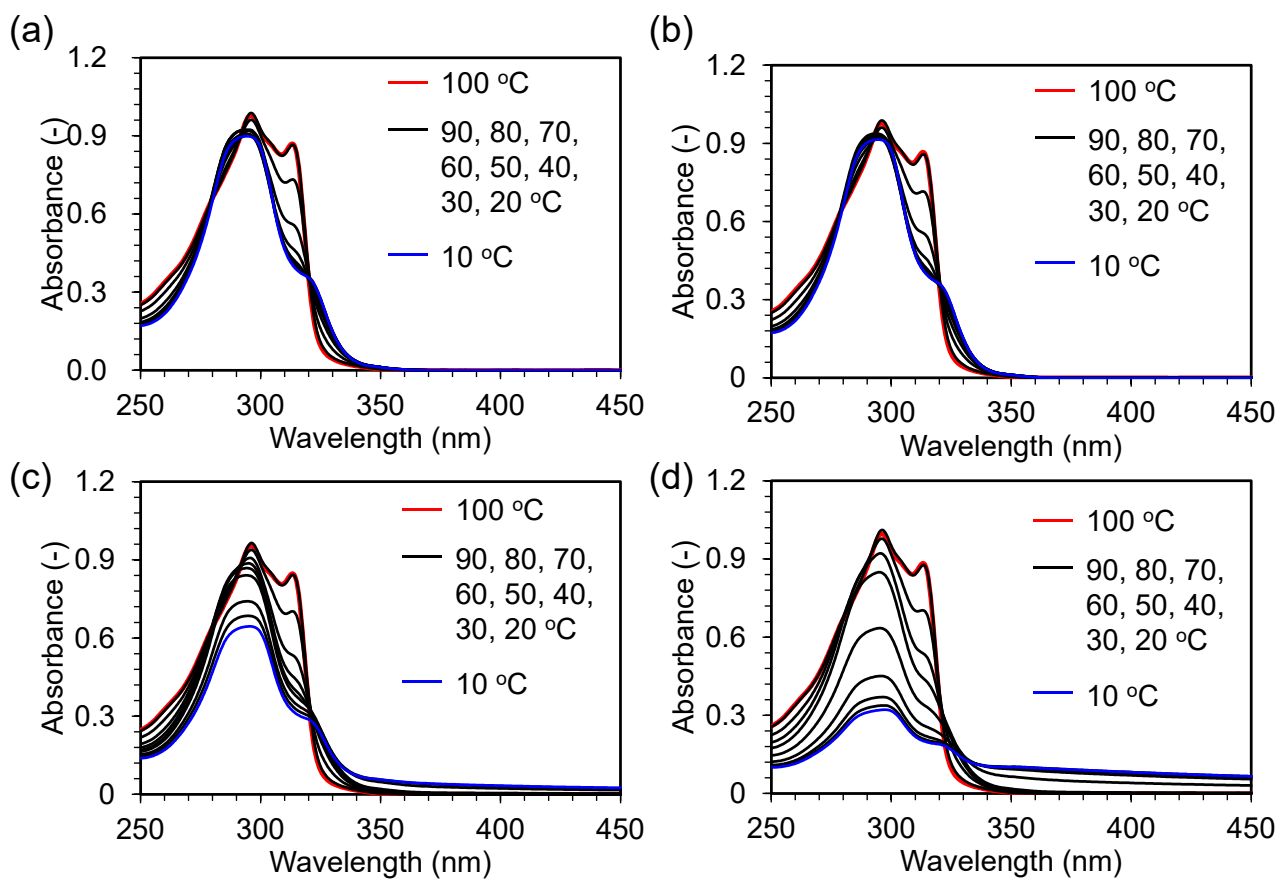

Fig. S3 Temperature-dependent UV-vis absorption spectra of **OPESi** in (a) 6, (b) 8, (c) 10, and (d) 12.5 wt% PDMS<sub>28000</sub>/OMTS solutions ( $[\text{OPESi}] = 5 \times 10^{-5} \text{ M}$ , path length = 2 mm, cooling rate = 1 °C/min).

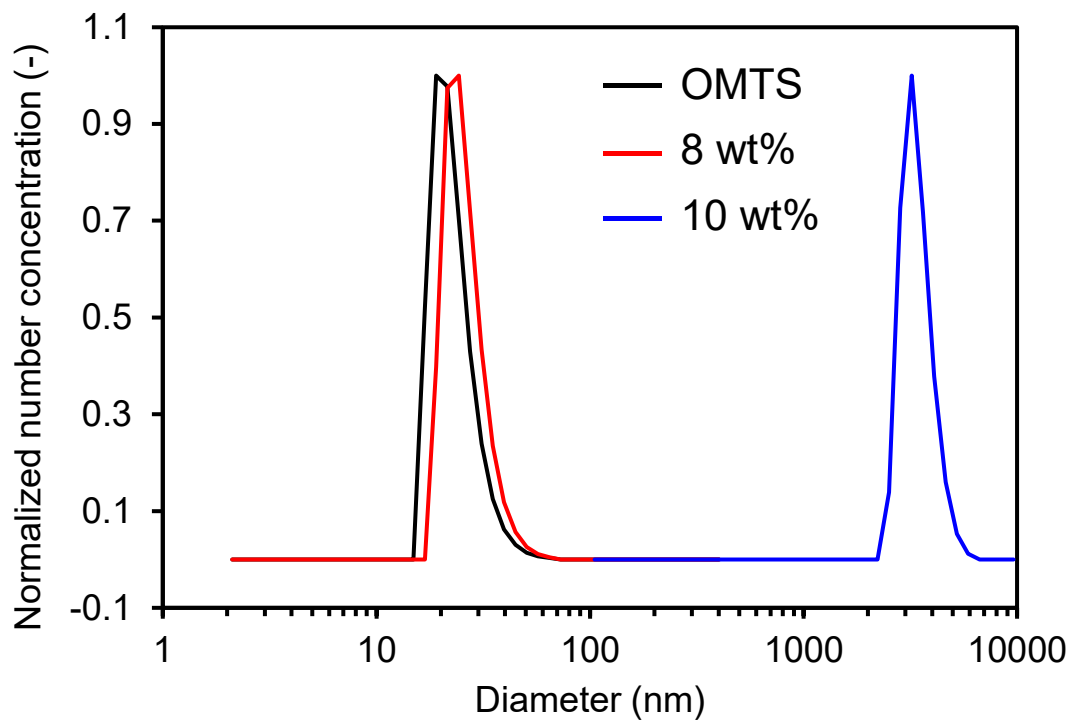

Fig. S4 Hydrodynamic diameter distributions of the assembled structures obtained by DLS measurements. Black line: pure OMTS; red line: 8 wt% PDMS<sub>28000</sub>/OMTS solution; blue line: 10 wt% PDMS<sub>28000</sub>/OMTS solution ( $[\text{OPESi}] = 5 \times 10^{-5} \text{ M}$ , 20 °C).

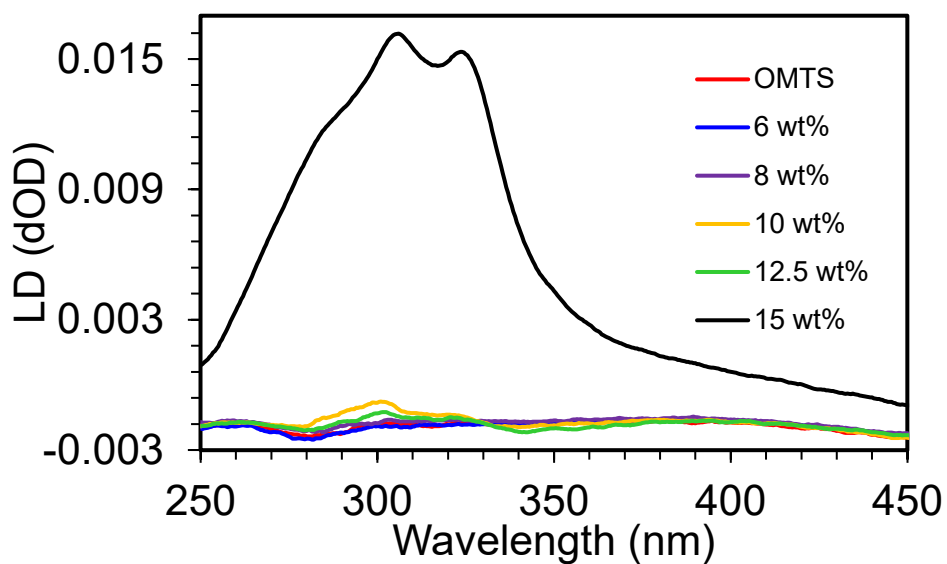

Fig. S5 Linear dichroism (LD) spectra of **OPESi** in pure OMTS and 6, 8, 10, 12.5, and 15 wt% PDMS<sub>28000</sub>/OMTS solutions at 10 °C ( $[\text{OPESi}] = 5 \times 10^{-5} \text{ M}$ , path length = 2 mm).

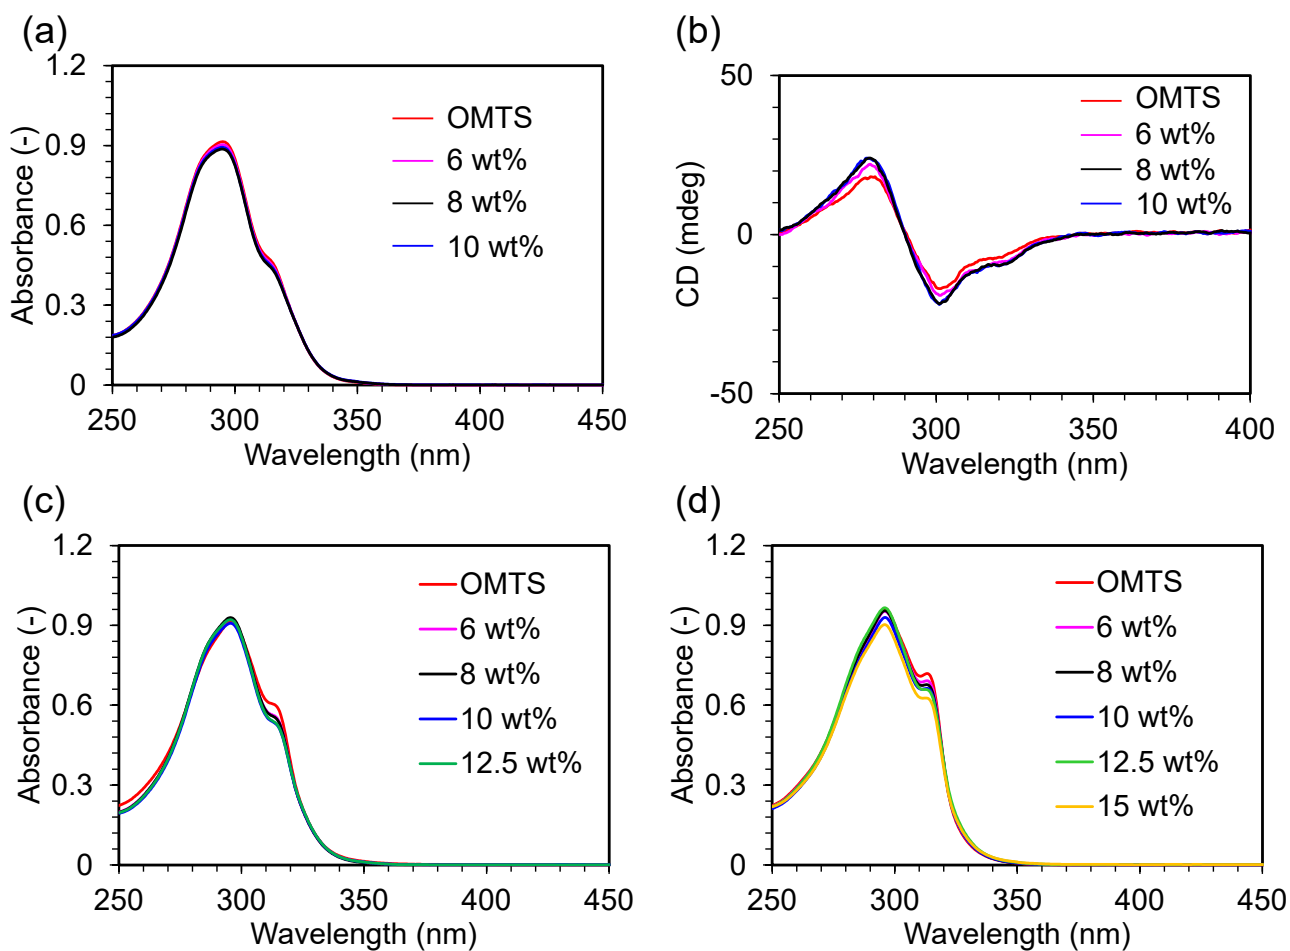

Fig. S6 UV-vis absorption (a, c, d) and CD spectra (b) of **OPESi** in pure OMTS and PDMS<sub>28000</sub>/OMTS solutions at (a, b) 60 °C, (c) 70 °C, and (d) 78 °C ( $[\text{OPESi}] = 5 \times 10^{-5}$  M, path length = 2 mm).

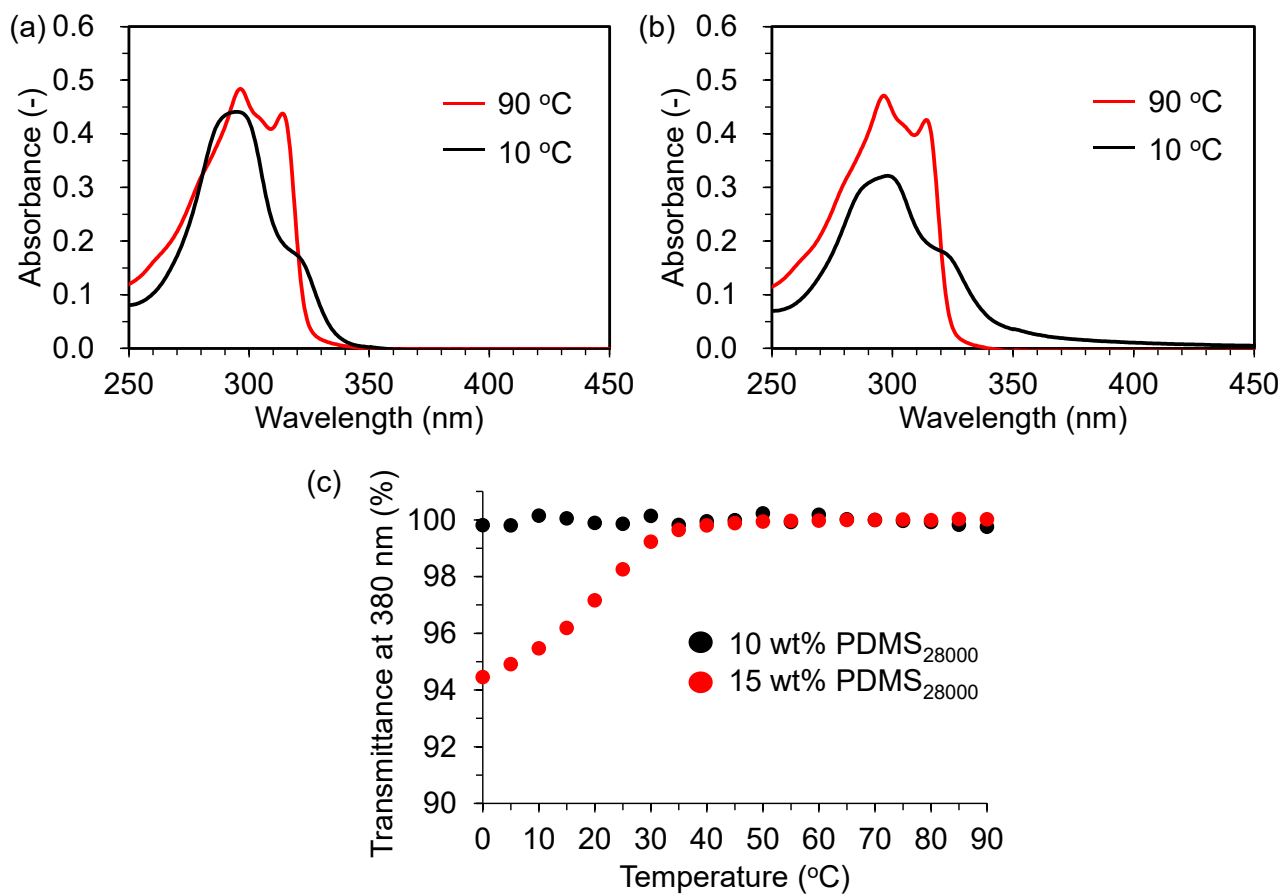

Fig. S7 Temperature-dependent UV-vis absorption spectra of  $5 \times 10^{-6}$  M **OPESi** in (a) 10 and (b) 15 wt% PDMS<sub>28000</sub>/OMTS solutions (path length = 10 mm, cooling rate = 1 °C/min). (c) Temperature-dependent transmittance of  $5 \times 10^{-6}$  M **OPESi** in 10 and 15 wt% PDMS<sub>28000</sub>/OMTS solutions.

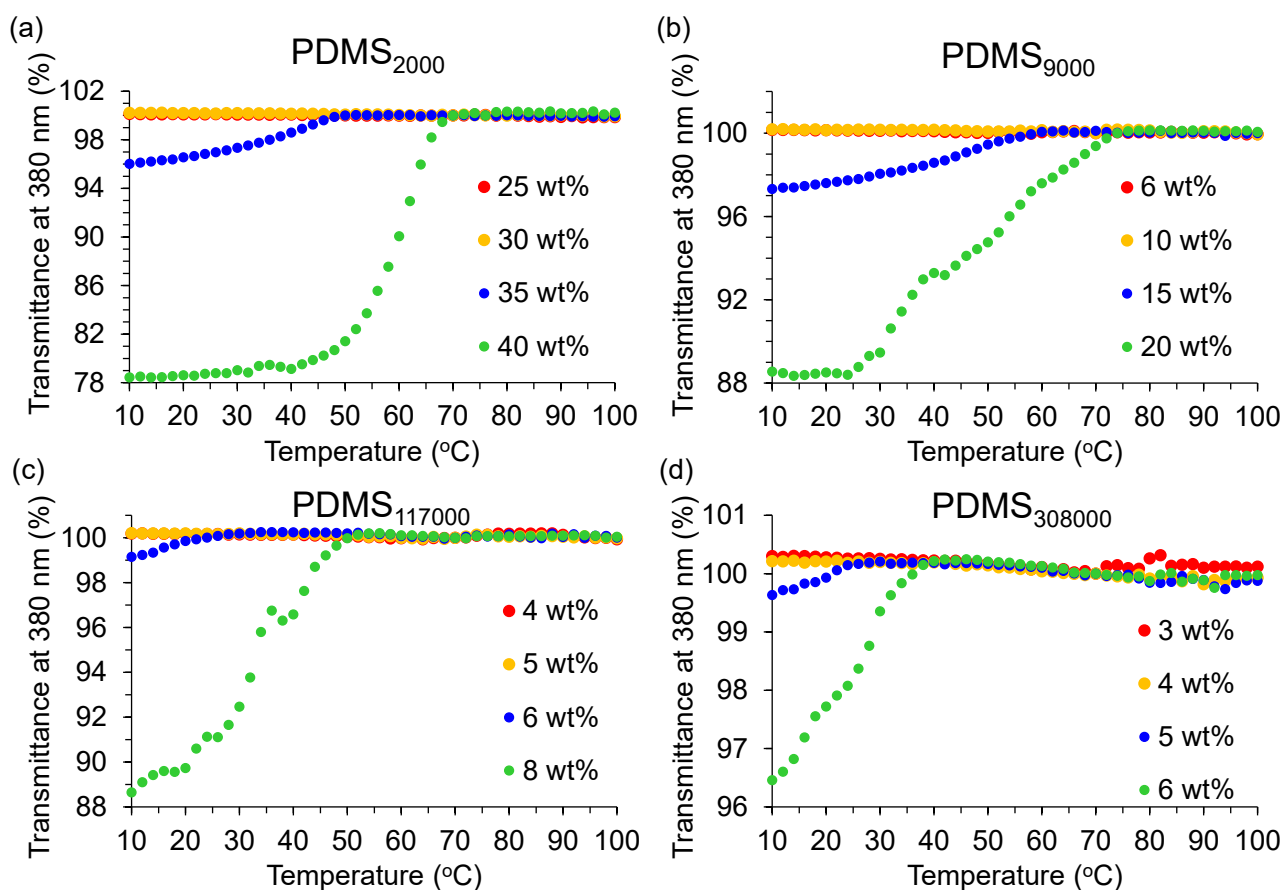

Fig. S8 Temperature-dependent transmittance of  $5 \times 10^{-5}$  M **OPESi** in (a) PDMS<sub>2000</sub>, (b) PDMS<sub>9000</sub>, (c) PDMS<sub>117000</sub>, and (d) PDMS<sub>308000</sub>/OMTS solutions (path length = 2 mm, cooling rate = 1 °C/min).

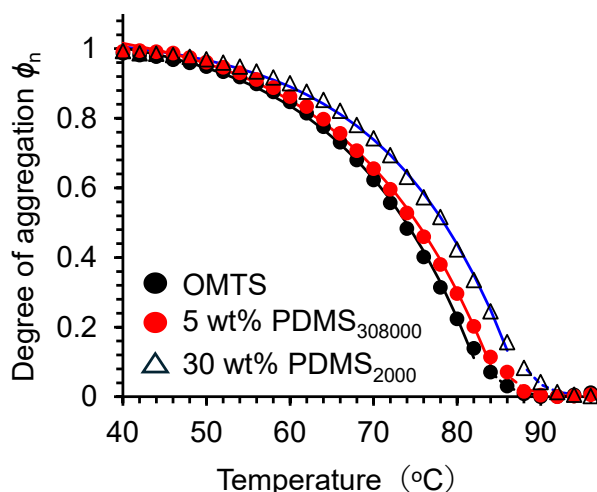

Fig. S9. Temperature-dependent degree of aggregation for **OPESi** in pure OMTS, 5 wt% PDMS<sub>308000</sub>, and 30 wt% PDMS<sub>2000</sub>. The solid and dotted lines are the fitted curves in the elongation and nucleation regimes, respectively.

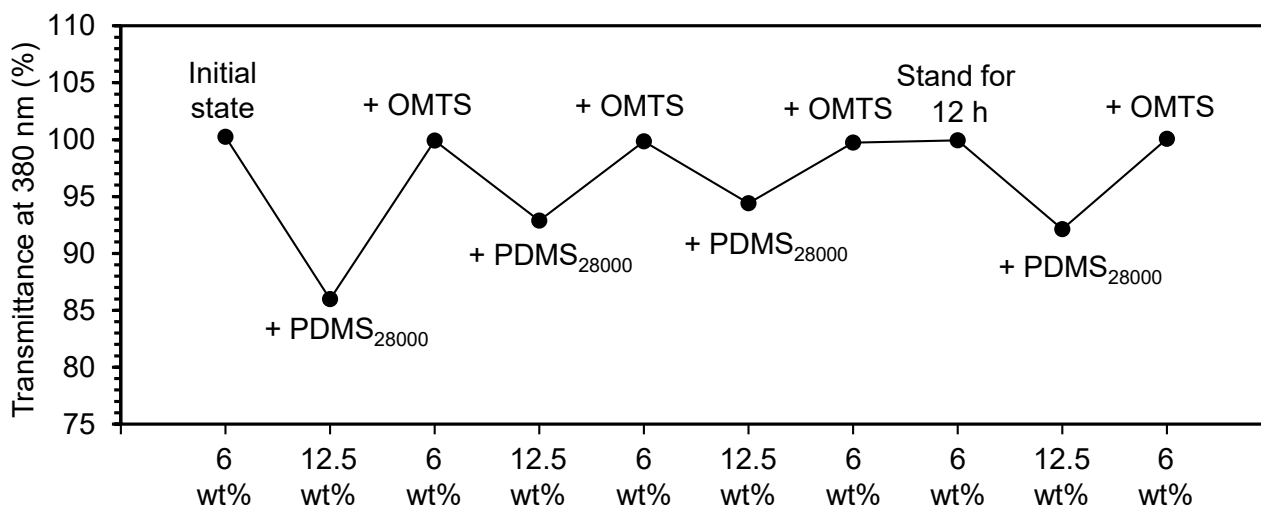

Fig. S10. Reversible changes in the transmittance of the **OPESi** solution in OMTS ( $[\text{OPESi}] = 5 \times 10^{-5} \text{ M}$ , path length = 2 mm) upon varying the  $\text{PDMS}_{28000}$  concentration at room temperature. The initial concentration of  $\text{PDMS}_{28000}$  was 6 wt%, and this concentration was increased to 12.5 wt% by the addition of further  $\text{PDMS}_{28000}$ , with simultaneous addition of a  $1 \times 10^{-4} \text{ M}$  **OPESi** solution in OMTS to maintain a constant **OPESi** concentration. Subsequently, the mixture was diluted with a  $5 \times 10^{-5} \text{ M}$  solution of **OPESi** in pure OMTS to restore the  $\text{PDMS}_{28000}$  concentration to 6 wt%. This cycle of transmittance decrease and complete recovery was reproducibly repeated.

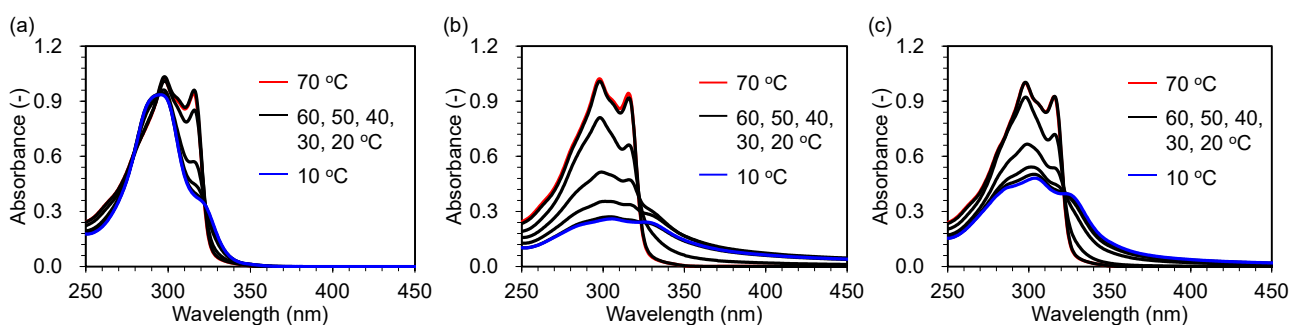

Fig. S11. Temperature-dependent UV-vis spectra of **OPESi** in (a) pure MCH, (b) a 15 wt%  $\text{PDMS}_{28000}$ /MCH solution and (c) a 10 wt% poly(isobutylene) ( $M_n = 200,000$ )/MCH solution ( $[\text{OPESi}] = 5 \times 10^{-5} \text{ M}$ , path length = 2 mm, cooling rate =  $1 \text{ }^\circ\text{C}/\text{min}$ ).

Table S1. Viscosities of pure OMTS and PDMS/OMTS solutions with varying PDMS concentrations at room temperature.

|                             | Viscosity (mPa · s) |                             | Viscosity (mPa · s) |                                | Viscosity (mPa · s) |                              | Viscosity (mPa · s) |                              | Viscosity (mPa · s) |
|-----------------------------|---------------------|-----------------------------|---------------------|--------------------------------|---------------------|------------------------------|---------------------|------------------------------|---------------------|
| OMTS                        | 0.8                 | 6 wt% $\text{PDMS}_{9000}$  | 1.4                 | 6 wt% $\text{PDMS}_{28000}$    | 1.7                 | 4 wt% $\text{PDMS}_{117000}$ | 2.7                 | 3 wt% $\text{PDMS}_{308000}$ | 3.5                 |
| 25 wt% $\text{PDMS}_{2000}$ | 1.6                 | 10 wt% $\text{PDMS}_{9000}$ | 1.7                 | 8 wt% $\text{PDMS}_{28000}$    | 2.2                 | 5 wt% $\text{PDMS}_{117000}$ | 3.4                 | 4 wt% $\text{PDMS}_{308000}$ | 5.0                 |
| 30 wt% $\text{PDMS}_{2000}$ | 1.8                 | 15 wt% $\text{PDMS}_{9000}$ | 2.4                 | 10 wt% $\text{PDMS}_{28000}$   | 2.6                 | 6 wt% $\text{PDMS}_{117000}$ | 4.1                 | 5 wt% $\text{PDMS}_{308000}$ | 7.0                 |
| 35 wt% $\text{PDMS}_{2000}$ | 2.1                 | 20 wt% $\text{PDMS}_{9000}$ | 3.2                 | 12.5 wt% $\text{PDMS}_{28000}$ | 3.3                 | 8 wt% $\text{PDMS}_{117000}$ | 6.1                 | 6 wt% $\text{PDMS}_{308000}$ | 9.5                 |
| 40 wt% $\text{PDMS}_{2000}$ | 2.4                 |                             |                     | 15 wt% $\text{PDMS}_{28000}$   | 4.1                 |                              |                     |                              |                     |

The degree of aggregation ( $\phi_n$ ) was analyzed based on a nucleation–elongation model using Eq. S1 and Eq. S2

$$\phi_n = \phi_{\text{SAT}}(1 - \exp[-\frac{h_e}{RT_e^2}(T - T_e)]) \quad \text{Eq. S1}$$

$$\phi_n = K_a^{1/3} \exp[(2/3K_a^{-1/3} - 1)\frac{h_e}{RT_e^2}(T - T_e)] \quad \text{Eq. S2}$$

where  $\phi_{\text{SAT}}$  is the parameter necessary to equate  $\phi_n / \phi_{\text{SAT}}$  to unity,  $h_e$  is the enthalpy released during elongation,  $T_e$  is the elongation temperature,  $R$  is the gas constant and  $K_a$  is the dimensionless equilibrium constant of the activation step at  $T_e$ . The  $\phi_n$  values were calculated from absorbance at 315 nm using Eq. S3

$$\phi_n = \frac{A_{\text{Max}} - A}{A_{\text{Max}} - A_{\text{Min}}} \quad \text{Eq. S3}$$

where  $A_{\text{Max}}$ ,  $A_{\text{Min}}$ , and  $A$  are the maximum absorbance, the minimum absorbance, and the absorbance at a given temperature, respectively, measured at 315 nm.

Table S2. Thermodynamic parameters for the self-assembly of **OPESi** in OMTS, 5 wt% PDMS<sub>308000</sub>, and 30 wt% PDMS<sub>2000</sub>.

|                              | $T_e$<br>(°C) | $h_e$<br>(kJmol <sup>-1</sup> ) | $K_a$<br>(-)           |
|------------------------------|---------------|---------------------------------|------------------------|
| OMTS                         | 84            | -68                             | 5.3 x 10 <sup>-4</sup> |
| 5 wt% PDMS <sub>308000</sub> | 85            | -65                             | 4.8 x 10 <sup>-4</sup> |
| 30 wt% PDMS <sub>2000</sub>  | 88            | -74                             | 6.9 x 10 <sup>-4</sup> |
